# Supplementary material for: Precise and Rapid Validation of Candidate Gene by Allele Specific Knockout With CRISPR/Cas9 in Wild Mice
Source: PubMed Central journal article supplement (PMC6390232; doi:10.3389/fgene.2019.00124), 2019-02-19
Supplement: Data_Sheet_1.pdf [file Data_Sheet_1.pdf]

## Supplementary Datasheet 1. Alignment of amino acid sequences of CD44 between PWD and B6 mice

|     |                                                               |     |
|-----|---------------------------------------------------------------|-----|
| B6  | MDKFWWHTAWGLCLLQLSLAHPHQIDLVNVTCRYAGVFHVEKNGRYSISRTEAADLCQAF  | 60  |
| PWD | MDKFWWHTAWGLCLLQLSLA--HQQIDLVNVTCRYAGVFHVEKNGRYSISRTEAADLCQAF | 58  |
|     | *****                                                         |     |
| B6  | NSTLPTMDQMKLALSKEFETCRYGFIENNVVIPRIHPNAICANHTGVYILVTSNTSHYD   | 120 |
| PWD | NSTLPTMDQMKLALSKEFETCRYGFIENNVVIPRIHPNAICANHTGVYILVTSNTSHYD   | 118 |
|     | *****                                                         |     |
| B6  | TYCFNASAPPEEDCTSVTDLPSNFDGPVTITIVNRDGTTRYSKKGEYRTHQEDIDASNIID | 180 |
| PWD | TYCFNASAPPEEDCTSVTDLPSNFDGPVTITIVNRDGTTRYSKKGEYRTHQEDIDASNIID | 178 |
|     | *****                                                         |     |
| B6  | DDVSSGSTIEKSTPESYILHTYLPTEQPTGDQDSDFFIRSTLATIASTVHSHKSHAAAQKQ | 240 |
| PWD | DDVSSGSTIEKSTPESYILHTYLPTEQPTGDQDSDFFIRSTLATIASTVHSHKSHAAAQKQ | 238 |
|     | *****                                                         |     |
| B6  | NNWIWSWFGNSQSTTQTQEPPTSATTALMTTPETPPKRQEAQNWFSWLFQPSSEKSHLHT  | 300 |
| PWD | NNWIWSWFGNSQSTTQTQEPPTSATTALMTTPETPPKRQEAQNWFSWLFQPSSEKSHLHT  | 298 |
|     | *****                                                         |     |
| B6  | TTKMPGTESNTNPTGWEPNEENEDETDKYPSPFSGSIDDEDIFSSTIASTPRVSARTED   | 360 |
| PWD | TTKMPGTESNTNPTGWEPNEENEDETDKYPSPFSGSIDDEDIFSSTIASTPRVSARTED   | 358 |
|     | *****                                                         |     |
| B6  | NQDWTQWKPNSNPEVLLQTTTRMADIDRISTSAHGENWTPEPQPPFNHEYQDEEETPH    | 420 |
| PWD | NQDWTQWKPNSNPEVLLQTTTRMADIDRISTSAHGENWTPEPQPPFNHEYQDEEETPH    | 418 |
|     | *****                                                         |     |
| B6  | ATSTTPNSTAEAAATQQETWFQNGWQGNPPTPSED SHVTEGTASAHNNHPSQRITTS    | 480 |
| PWD | ATSTTPNSTAEAAATQQETWFQNGWQGNPPTPSED SHVTEGTASAHNNHPSQRITTS    | 478 |
|     | *****                                                         |     |
| B6  | QEDVSWTDFDPI SHPMGQGHQTESKDTDSSHSTTLQPTAAPNTHLVEDLNRTGPLSVTT  | 540 |
| PWD | QEDVSWTDFDPI SHPMGQGHQTESKDTDSSHSTTLQPTAAPNTHLVEDLNRTGPLSVTT  | 538 |
|     | *****                                                         |     |
| B6  | PQSHSQNFSTLHGEPEEDENHPTTSLPSSSTKSGAKDARRGSLPTDSTTSVEGYTFQYP   | 600 |
| PWD | PQSHSQNFSTLHGEPEEDENHPTTSLPSSSTKSGAKDARRGSLPTDSTTSVEGYTFQYP   | 598 |
|     | *****                                                         |     |
| B6  | DTMENGTLFPVTPAKTEVFGETEVTLATDSNVNVDGSLPGDRDSSKDSRGSSRTVTHGSE  | 660 |
| PWD | DTMENGTLFPVTPAKTEVFGETEVTLATDSNVNVDGSLPGDRDSSKDSRGSSRTVTHGSE  | 658 |
|     | *****                                                         |     |
| B6  | LAGHSSANQDSGVTTS GPMRRPQIPEWLIILASLLALALILAVCI AVNSRRRCGQKKKL | 720 |
| PWD | LAGHSSANQDSGVTTS GPMRRPQIPEWLIILASLLALALILAVCI AVNSRRRCGQKKKL | 718 |
|     | *****                                                         |     |
| B6  | VINGNGTVEDRKPSSELNGEASKSQEMVHLVNKEPSETPDQCMTADETRNLQSVDKIGV   | 780 |
| PWD | VINGNGTVEDRKPSSELNGEASKSQEMVHLVNKEPSETPDQCMTADETRNLQSVDKIGV   | 778 |
|     | *****                                                         |     |
| B6  | * 780                                                         |     |
| PWD | * 778                                                         |     |
|     | *                                                             |     |
